# Supplementary material
Source: PubMed Central journal article supplement (PMC2700920)
Supplement: 0811119106_0811119106SI.pdf [file 0811119106_0811119106SI.pdf]

# Supporting Information

Zhou et al. 10.1073/pnas.0811119106

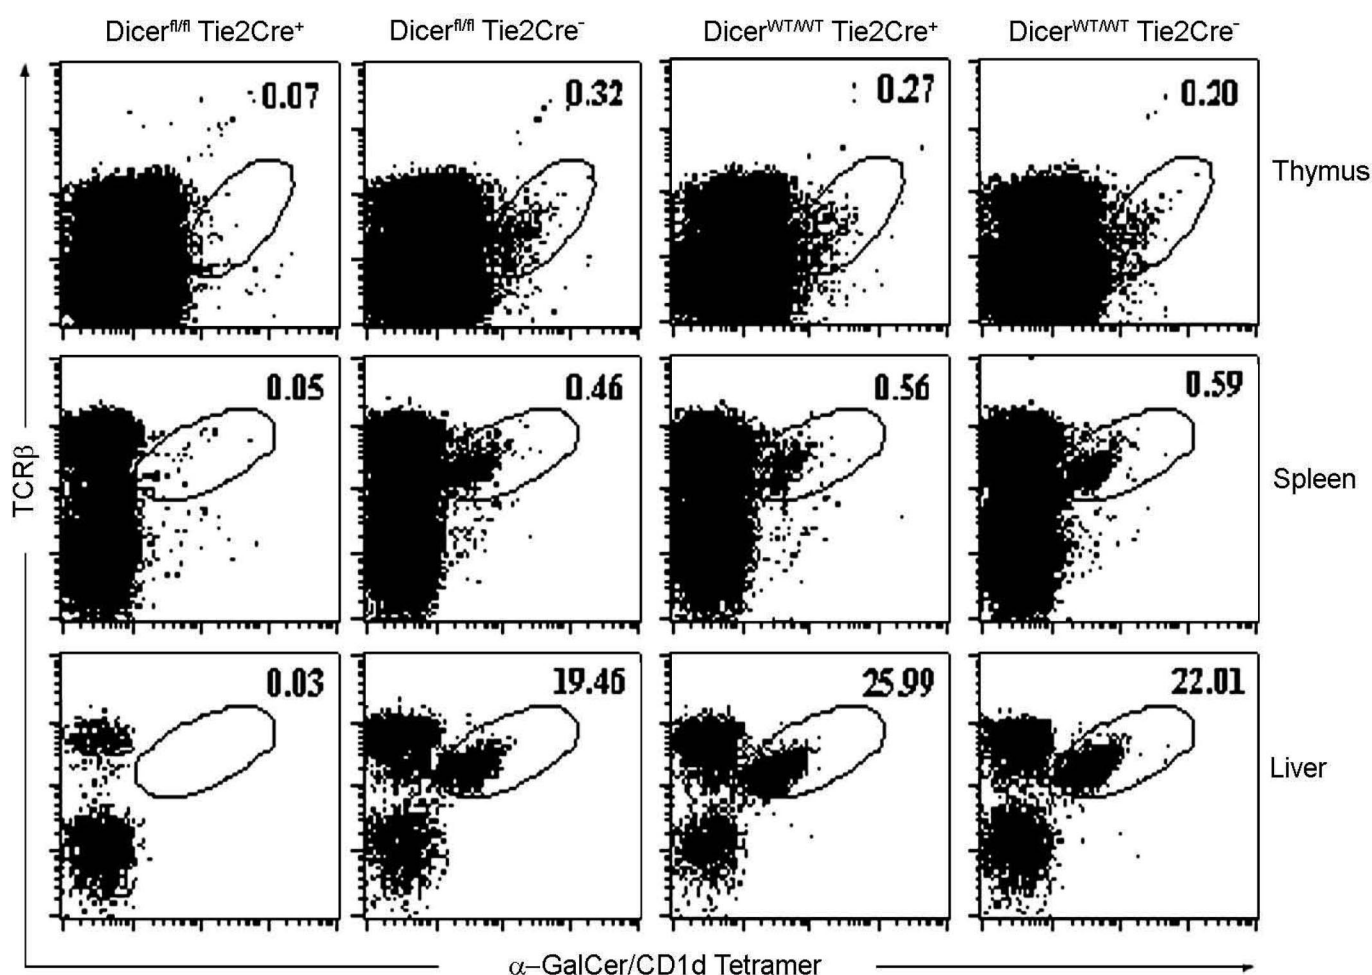

**Fig. S1.** Invariant natural killer T (iNKT) cells in Tie2-Cre transgenic and  $Dicer^{fl/fl}$  mice. Thymic, splenic, and hepatic iNKT cells from  $Dicer^{fl/fl}Tie2Cre^{+}$ ,  $Dicer^{fl/fl}Tie2Cre^{-}$ ,  $Dicer^{WT/WT}Tie2Cre^{+}$ , and  $Dicer^{WT/WT}Tie2Cre^{-}$  littermates were identified as  $TCR\beta^{+}Tetramer^{+}$  cells. In the spleen and liver, iNKT cells were gated on the B220<sup>lo</sup> spleen and liver cells. There were no significant differences among  $Dicer^{fl/fl}Tie2Cre^{-}$ ,  $Dicer^{WT/WT}Tie2Cre^{+}$ , and  $Dicer^{WT/WT}Tie2Cre^{-}$  mice. However, iNKT cells were significantly reduced in  $Dicer^{fl/fl}Tie2Cre^{+}$  mice.

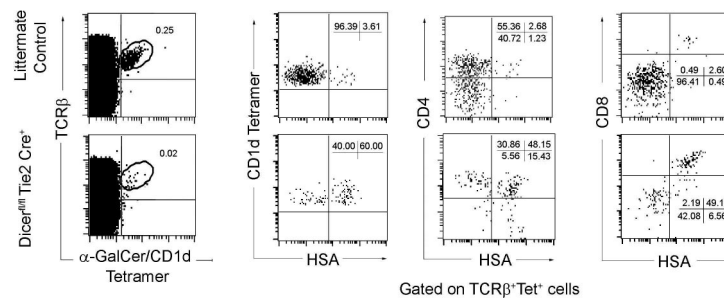

**Fig. S2.** Defective thymic  $\alpha$ NKT cell development in  $Dicer^{fl/fl}$ Tie-2Cre<sup>+</sup> mouse. TCRbeta<sup>+</sup>Tetramer<sup>+</sup> thymic  $\alpha$ NKT cells were analyzed for the expression of CD24 (HSA), CD4, and CD8 in  $Dicer^{fl/fl}$ Tie-2Cre<sup>+</sup> mice and WT littermate control.

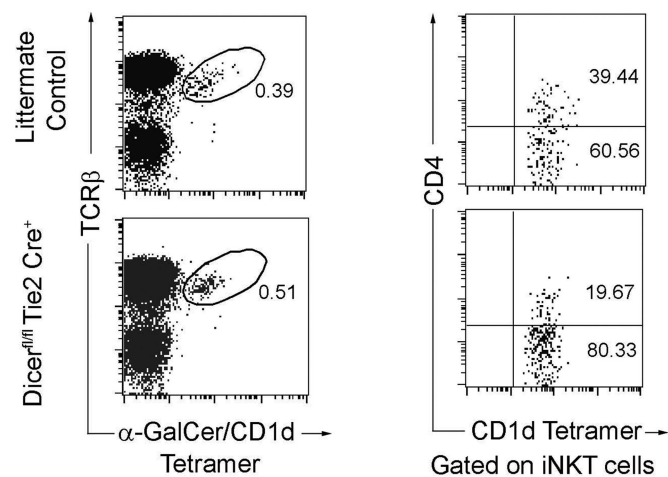

**Fig. S3.** The *i*NKT cell homeostasis in the spleen from Dicer deletion mice. CD8-depleted thymocytes (up to 4% of recovered thymocytes were Tetramer<sup>+</sup>*i*NKT cells) from CD45.1-congenic mice were transferred to irradiated 6 week-old *Dicer*<sup>fl/fl</sup>*Tie2*<sup>cre</sup> or littermate control mice (2 to 3 mice per group). The CD45.1<sup>+</sup> lymphocytes from the spleen were analyzed for *i*NKT cells at day 5 after transferring. The percentages of CD4<sup>+</sup> *i*NKT cells were further analyzed in the spleen on the gated *i*NKT cells.
